# Supplementary material
Source: MDPI journal article supplement (https://www.mdpi.com/2073-4441/13/22/3179)
Supplement: s1 [file s1]

# Recovery and Restoration of Biloxi Marsh in the Mississippi River Delta

G. Paul Kemp <sup>1,\*</sup>, Elizabeth C. McDade <sup>2</sup>, John W. Day <sup>1,3</sup>, Robert R. Lane <sup>3</sup>, Nancye H. Dawers <sup>4</sup> and Jason N. Day <sup>3</sup>

<sup>1</sup> Department of Oceanography & Coastal Sciences, Louisiana State University, Baton Rouge, LA 70803, USA; johnday@lsu.edu

<sup>2</sup> Chinn-McDade Associates LLC, 1401 Distributors Row, Suite C, New Orleans, LA 70123, USA; ecmcdade@bellsouth.net

<sup>3</sup> Comite Resources, P.O. Box 66596, Baton Rouge, LA 70896, USA; rlane@comiteres.com (R.R.L.); jnday@comiteres.com (J.N.D.)

<sup>4</sup> Department of Earth & Environmental Sciences, 101 Blessey Hall, Tulane University, New Orleans, LA 70118, USA; ndawers@tulane.edu

\* Correspondence: gpkemp@lsu.edu; Tel.: +1-225-772-1426

## 1. Supplementary Figures

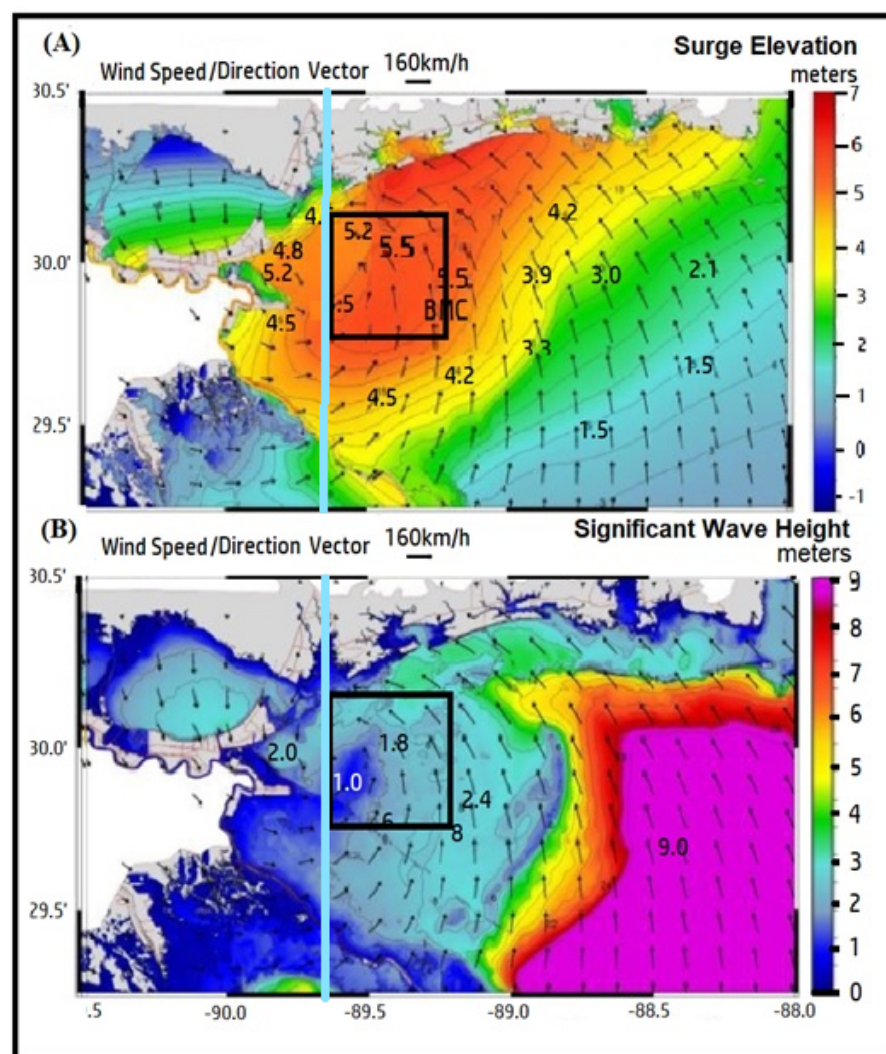

**Figure S1.** Effect on surge and waves in the Lake Borgne–MRGO “Funnel” at 0900 CDT, August 29, 2005. South to north track of Hurricane Katrina overlaid in light blue on simulation of a tightly coupled SWAN+ADCIRC (wave+surge) model hindcast (ADCIRC SL16). (A) The steepest rise in surge

elevation is on eastern margin of Biloxi Marsh study area (black box). Surge is lower in Lake Borgne and Lake Pontchartrain. **(B)** Bottom friction and wave breaking on the Chandeleur Islands and shoals, and similar interactions on the Biloxi Marsh reduce significant wave height in the Funnel. Modified from [23].

While coastal topography and bathymetry changes little from year to year, the storms themselves vary greatly in speed and direction of approach, which affects duration and speed of winds from any direction. Wetlands generally provide more protection to New Orleans from faster moving, smaller diameter storms than from slower, larger ones, but the Biloxi Marsh is well situated to have a beneficial reduction for most storms tracking east of the city.

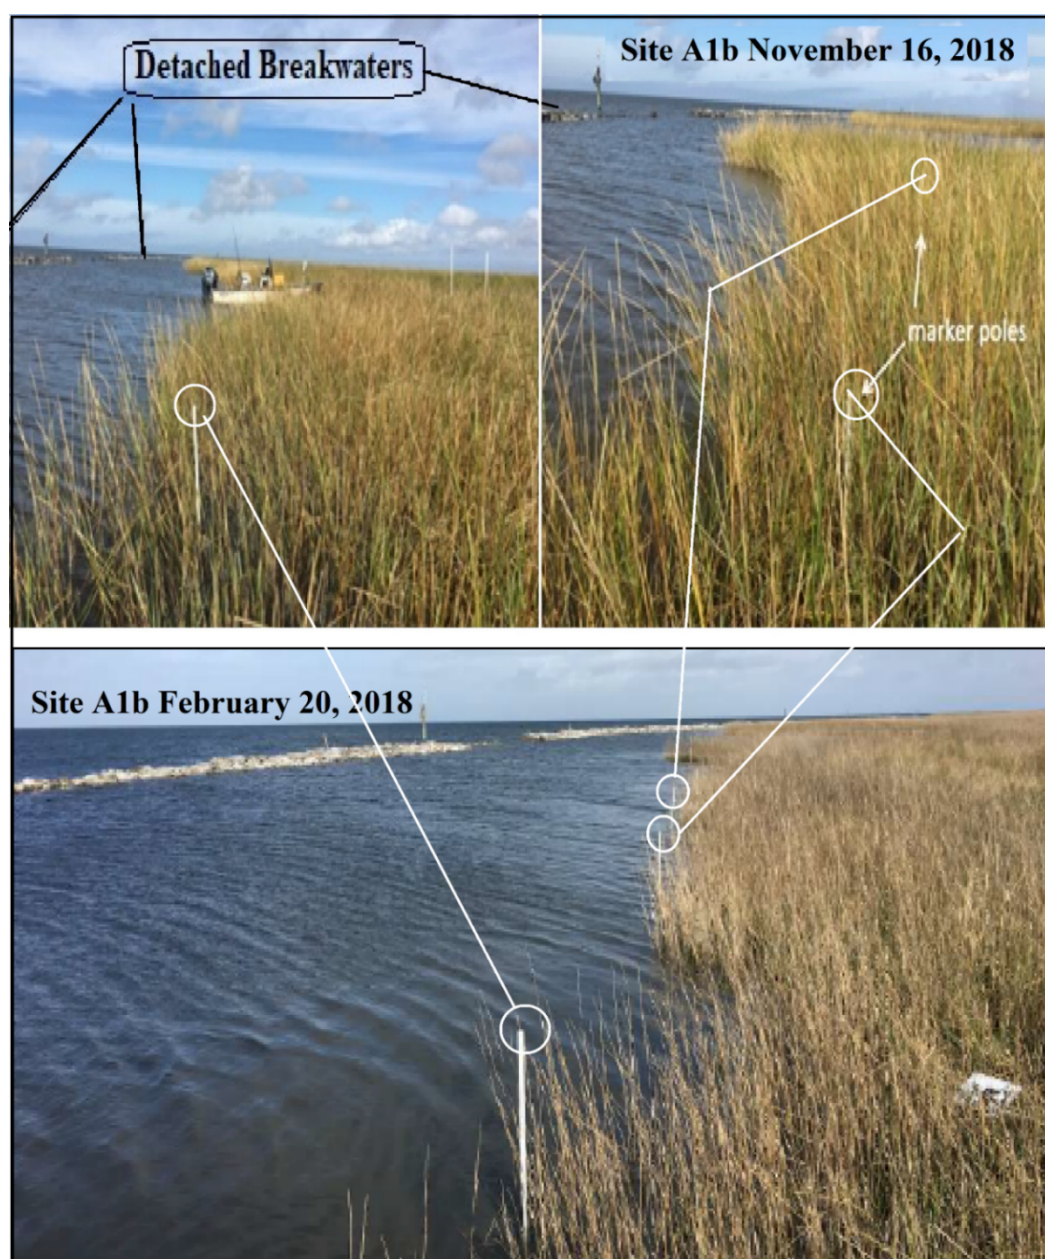

**Figure S2.** Lake Borgne Marsh Site A1b behind detached breakwaters built in 2013. Bottom panel shows monitoring poles placed along base of marsh edge scarp on February 20, 2018. Top panel show pole positions on November 16, 2018, demonstrating advance of vegetated shoreline over 9 months into Lake (86 cm  $\pm$  10 cm) behind the CPRA breakwaters [37].



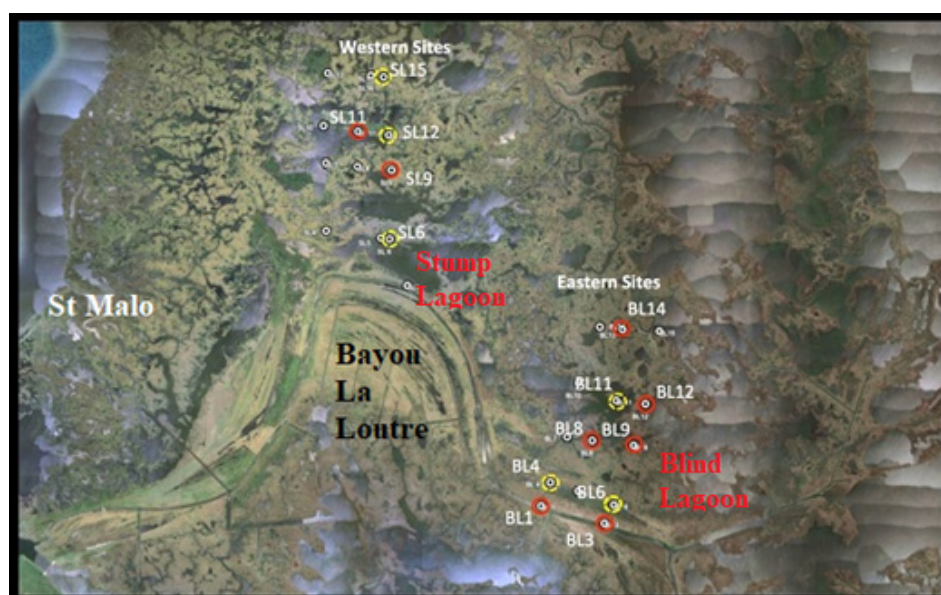

**Figure S3.** Location of interior marsh sites established by University of New Orleans researchers in 2003 and 2004, and reoccupied in 2018 by Lane et al. [19].

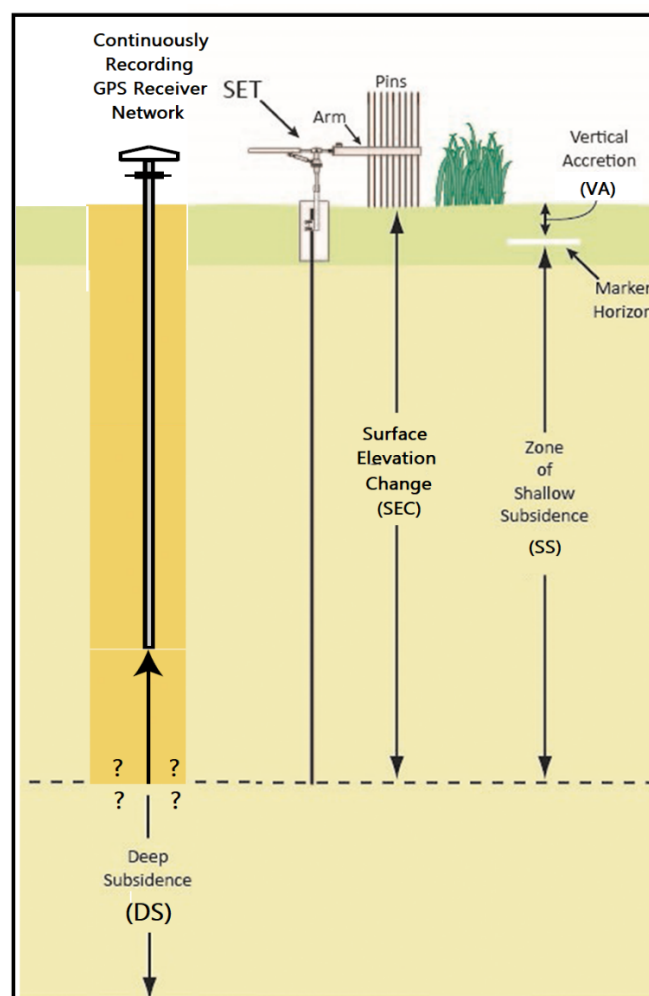

**Figure S4.** Using the Sediment Erosion Table (SET) and Marker Horizon (MH) techniques in tandem to determine Surface Elevation Change (SEC), Vertical Accretion (VA), Shallow Subsidence ( $SS = VA - SEC$ ), Deep Subsidence (DS), and Total Subsidence ( $TS = SS + DS$ ), Local Sea Level Rise (MSLR), and Relative Sea Level Rise ( $RSLR = TS + LSLR$ ). Modified from [69].

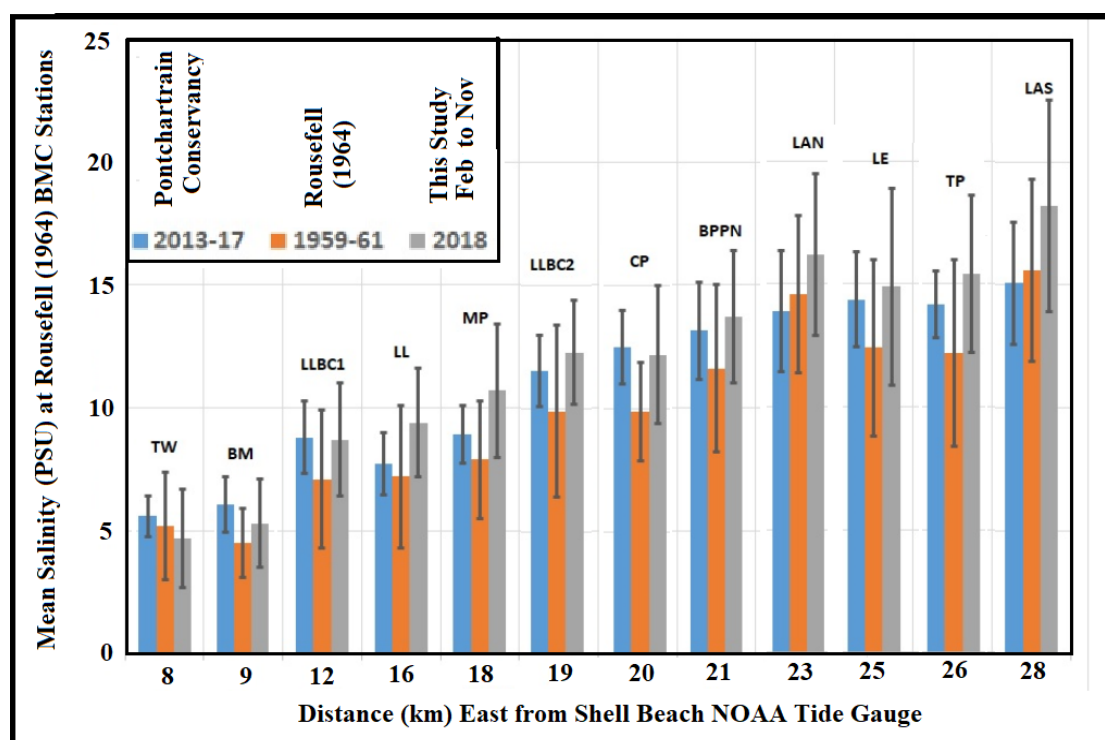

**Figure S5.** Comparing salinity at sites established by Rousefell [72] from 1959–61 (Figure 2), Pontchartrain Conservancy from 2013–18, and from this 2018 sampling [18]. Stations are ranked by distance from the NOAA Shell Beach Gauge at the south end of Lake Borgne. No significant differences between the three datasets were found.

## 2. Supplementary Tables

**Table S1.** Salinity (psu from Conductivity) at 2018 Marsh Sites and Rousefell Stations from March to November, 2018; See Figure 2 for locations.

| Site                    | 3/20/2018  | 4/25/2018 | 6/26/2018 | 7/5/2018  | 8/13/2018  | 9/12/2018  | 11/16/2018 | Mean (SD)  |
|-------------------------|------------|-----------|-----------|-----------|------------|------------|------------|------------|
| 2018 Marsh Sites        |            |           |           |           |            |            |            |            |
| A1a                     | 4.2        | 1.7       | 1.7       | 1.8       | –          | 9.7        | 8.1        | 4.5 (3.6)  |
| A1b                     | 4.4        | 1.4       | 2.2       | 1.6       | 5.1        | 10.1       | 7.0        | 4.5 (3.2)  |
| A1c                     | –          | 1.7       | 1.9       | –         | –          | 10.0       | 7.5        | 5.3 (4.1)  |
| A2                      | 22.8       | 12.3      | 14.5      | –         | –          | 22.9       | 12.7       | 17.0 (5.4) |
| A3                      | 7.3        | 4.6       | 4.4       | –         | –          | 8.4        | 6.8        | 6.3 (1.7)  |
| B1                      | 7.9        | 4.7       | 9.5       | 7.8       | –          | 12.4       | 9.6        | 8.7 (2.6)  |
| B2                      | 6.5        | 7.1       | 11.0      | –         | –          | 10.9       | 8.5        | 8.8 (2.1)  |
| C1                      | 8.2        | 6.7       | 11.8      | 10.4      | –          | 13.7       | 10.7       | 10.3 (2.5) |
| C2                      | 16.0       | 11.6      | 14.8      | –         | –          | 16.9       | 13.5       | 14.6 (2.1) |
| 2018 Rousefell Stations |            |           |           |           |            |            |            |            |
| BM                      | 4.3        | 3.4       | 3.7       | –         | 6.1        | 7.1        | 7.4        | 5.3 (1.8)  |
| BPPN                    | 15.4       | 9.6       | 13.9      | –         | 16.3       | 15.7       | 11.1       | 13.7 (2.7) |
| CP                      | 12.3       | 8.2       | 13.0      | –         | 15.7       | 14.3       | 9.8        | 12.2 (2.8) |
| LAN                     | 18.3       | 12.3      | 13.7      | –         | 18.5       | 20.4       | 13.8       | 16.2 (3.3) |
| LAS                     | 23.0       | 11.9      | 14.3      | 19.5      | 19.5       | 21.2       | 15.7       | 17.9 (4.0) |
| LE                      | 18.1       | 11.6      | 10.6      | –         | 18.7       | 18.8       | 11.8       | 14.9 (2.1) |
| LL                      | 5.8        | 6.8       | 10.8      | 9.7       | 11.2       | 11.2       | 10.2       | 9.4 (2.2)  |
| LLBC1                   | 7.5        | 6.0       | 11.9      | 7.6       | 11.9       | 8.3        | 7.9        | 6.3 (1.7)  |
| LLBC2                   | 11.0       | 8.6       | 13.1      | 13.1      | 14.9       | 13.8       | 11.5       | 12.3 (2.1) |
| MP                      | 8.4        | 6.6       | 11.8      | –         | 12.8       | 13.8       | 10.6       | 10.7 (2.7) |
| TP                      | 18.6       | 10.3      | 15.0      | 15.0      | 17.7       | 18.8       | 12.7       | 15.4 (3.2) |
| TW                      | 4.8        | 1.6       | 3.8       | 3.7       | 5.1        | 7.9        | 6.3        | 4.7 (2.0)  |
| Mean (SD)               | 11.2 (6.3) | 7.2 (3.8) | 9.9 (4.7) | 9.0 (5.8) | 13.3 (5.2) | 13.6 (4.7) | 10.2 (2.6) | 10.5 (4.4) |

**Table S2.** Shoreline erosion and accretion at the 2018 marsh study sites. See Figure 2 for location.

| Site                              | A1a       | A1b      | A1c       | A2        | A3      | C2      | Mean    |
|-----------------------------------|-----------|----------|-----------|-----------|---------|---------|---------|
| <b>Bayside Stations</b>           |           |          |           |           |         |         |         |
| Bulk Density (g/cm <sup>3</sup> ) | 0.21      | 0.24     | 0.46      | 0.36      | 0.36    | 0.33    | 0.33    |
| Lateral Shore Movement            |           |          |           |           |         |         |         |
| Advance (+) Retreat (−)           | R         | A        | R         | R         | R       | R       |         |
| 10 mo. Total (cm)                 | −283 (33) | +86 (10) | −122 (29) | −124 (11) | 96 (29) | 99 (11) | +/− 135 |
| Estimated Annual (cm/y)           | −401      | +121     | −172      | −175      | −135    | −140    | +/− 191 |
| Surface Elevation Change          |           |          |           |           |         |         |         |
| 10 mo. VA (mm) 5 m                | 28 (1)    | 16 (1)   | 210*      | 13 (1)    | 17 (2)  | 15 (1)  | 18      |
| Est. Annual 5 m (mm/y)            | 39        | 23       | Shell     | 18        | 24      | 21      | 25      |
| 10 mo. VA (mm) 25 m               | 13 (1)    | 15 (1)   | 14 (3)    | 22 (3)    | 20 (3)  | 11 (2)  | 16      |
| Est. Annual 25 m (mm/y)           | 18        | 21       | 20        | 31        | 28      | 16      | 22      |
| 10 mo. VA (mm) 50 m               | 5 (0.4)   | 9 (0.4)  | 21 (1)    | 17 (1)    | 21 (1)  | 6 (1)   | 13      |
| Est. Annual 50 m (mm/y)           | 7         | 13       | 30        | 25        | 2       | 9       | 14      |
| <b>Inland Marsh Pond Stations</b> |           |          |           |           |         |         |         |
| Site                              | B1        | B2       | C1        | −         | −       | −       | Mean    |
| Bulk Density (g/cm <sup>3</sup> ) | 0.12      | 0.11     | 0.07      | −         | −       | −       | 0.10    |
| Lateral Shore Movement            |           |          |           |           |         |         |         |
| Advance (+) Retreat (−)           | R         | R        | R         | −         | −       | −       | −       |
| 10 mo. Total (cm)                 | −9 (7)    | −26 (7)  | −26 (8)   | −         | −       | −       | −20     |
| Estimated Annual (cm/y)           | −13       | −37      | −37       | −         | −       | −       | −29     |
| Marsh Surface Elevation           | Change    |          |           |           |         |         |         |
| 10 mo. VA (mm) 5 m                | 16 (1)    | 13 (1)   | 22 (1)    | −         | −       | −       | 17      |
| Est. Annual 5 m (mm/y)            | 22        | 19       | 31        | −         | −       | −       | 24      |
| 10 mo. VA (mm) 25 m               | 7 (1)     | 10 (1)   | 6 (1)     | −         | −       | −       | 8       |
| Est. Annual 25 m (mm/y)           | 11        | 14       | 8         | −         | −       | −       | 11      |
| 10 mo. VA (mm) 50 m               | 3 (0.2)   | 8 (1)    | 6 (1)     | −         | −       | −       | 6       |
| Est. Annual 50 m (mm/y)           | 4         | 12       | 9         | −         | −       | −       | 8       |

\* Only 1 measurement taken; shell beach berm deposit above marker layer.

**Table S3.** Soil Properties and Processes at CRMS stations active for more than a decade in the BMC and Breton Marshes (See Figure 3 for locations).

| CRMS Station                                        | Latitude<br>degrees North | Marsh Elev.<br>NAVD88 (mm) | SEC (mm/y) | VA (mm/y)   | SS = VA−SEC (mm/y) | DS (mm/y)  | TS = SS+DS (mm/y) | RSLR = TS + LSLR (mm/y) | OM (%)       | BD (g/cc)   | Sal (psu)  |
|-----------------------------------------------------|---------------------------|----------------------------|------------|-------------|--------------------|------------|-------------------|-------------------------|--------------|-------------|------------|
| 0003                                                | 30.10                     | 274                        | 53         | 20.1        | 14.8               | 1.0*       | 15.8              | 17.8                    | 5.2          | 0.64        | 14.1       |
| 4572                                                | 30.07                     | 233                        | 5.7        | 8.7         | 3.1                | 1.0*       | 4.1               | 6.1                     | 15.7         | 0.36        | 6.2        |
| 4596                                                | 30.06                     | 170                        | 4.3        | 10.4        | 6.1                | 1.0*       | 7.1               | 9.1                     | 5.7          | 0.69        | 6.8        |
| 1069                                                | 30.05                     | 288                        | 1.7        | 11.6        | 9.8                | 1.0*       | 10.8              | 12.8                    | 3.5          | 1.11        | 15.0       |
| 0108                                                | 29.96                     | 254                        | 6.8        | 11.4        | 4.6                | 1.0*       | 5.6               | 7.6                     | 23.1         | 0.28        | 8.5        |
| 1024                                                | 29.87                     | 226                        | 8.4        | 11.3        | 2.9                | 3.3        | 6.2               | 8.2                     | 16.5         | 0.42        | 11.0       |
| 4548                                                | 29.86                     | 197                        | 7.0        | 9.7         | 2.7                | 1.0*       | 3.7               | 5.7                     | 11.0         | 0.53        | 4.1        |
| 4551                                                | 29.85                     | 116                        | 8.2        | 13.6        | 5.4                | 1.0*       | 6.4               | 8.4                     | 15.0         | 0.31        | 4.1        |
| 4557                                                | 29.82                     | 170                        | 10.3       | 17.0        | 6.7                | 3.5        | 10.2              | 12.2                    | 24.3         | 0.22        | 11.1       |
| <b>BMC Mean</b>                                     | <b>29.96</b>              | <b>214.27</b>              | <b>6.4</b> | <b>12.6</b> | <b>6.2</b>         | <b>1.5</b> | <b>7.8</b>        | <b>9.8</b>              | <b>15.68</b> | <b>0.51</b> | <b>9.0</b> |
| <b>SD</b>                                           | <b>0.11</b>               | <b>55.84</b>               | <b>2.5</b> | <b>3.7</b>  | <b>3.9</b>         | <b>1.5</b> | <b>3.9</b>        | <b>3.9</b>              | <b>9</b>     | <b>0.28</b> | <b>4.1</b> |
| <b>BRETON MARSH SOUTH OF BAYOU TERRE AUX BOEUFs</b> |                           |                            |            |             |                    |            |                   |                         |              |             |            |
| 0146                                                | 29.73                     | 174                        | 7.1        | 14.2        | 7.1                | 3.8        | 10.9              | 12.9                    | 23.3         | 0.26        | 2.6        |
| 0135                                                | 29.69                     | 248                        | 0.1        | 10.6        | 10.5               | 4.0        | 14.5              | 16.5                    | 30.0         | 0.28        | 1.6        |
| 0131                                                | 29.69                     | 301                        | −2.1       | 7.9         | 10.0               | 4.0        | 14.0              | 16.0                    | 28.2         | 0.29        | 0.6        |
| 0132                                                | 29.66                     | 221                        | 0.8        | 10.7        | 9.9                | 4.1        | 14.0              | 16.0                    | 45.6         | 0.15        | 0.7        |
| 0147                                                | 29.66                     | 189                        | 4.6        | 7.0         | 2.4                | 4.1        | 6.5               | 8.5                     | 18.9         | 0.39        | 5.0        |
| 0136                                                | 29.62                     | 304                        | 3.8        | 15.3        | 11.5               | 4.2        | 15.7              | 17.7                    | 48.0         | 0.42        | 0.7        |
| <b>Breton Mean</b>                                  | <b>29.68</b>              | <b>239.39</b>              | <b>2.4</b> | <b>11.0</b> | <b>8.6</b>         | <b>4.0</b> | <b>12.6</b>       | <b>14.6</b>             | <b>32.3</b>  | <b>0.30</b> | <b>1.9</b> |
| <b>SD</b>                                           | <b>0.04</b>               | <b>55.16</b>               | <b>3.4</b> | <b>3.3</b>  | <b>3.4</b>         | <b>1.1</b> | <b>3.4</b>        | <b>3.4</b>              | <b>11.9</b>  | <b>0.10</b> | <b>1.7</b> |

**Table S4.** Subsidence and accretion data from Stump and Blind Lagoon SET Sites established in 2003, last monitored in 2008, and reoccupied 10 years later in 2018.

| UNO Site                  | 15-yr Marsh Elevation Change (mm) | SEC (mm/y)   | 15-yr Marsh Accretion (mm) | VA (mm/y)    | 15-yr Shallow Subsidence (mm) | SS (mm/y)    | DS (mm/y)  | TS (mm/y)    | RSLR (mm/y)  |
|---------------------------|-----------------------------------|--------------|----------------------------|--------------|-------------------------------|--------------|------------|--------------|--------------|
| <b>Stump Lagoon Sites</b> |                                   |              |                            |              |                               |              |            |              |              |
| SL6                       | −88.5                             | −5.8         | −                          | −            | −                             | −            | 3.2        | −            | −            |
| SL9                       | 12.4                              | 0.8          | 51.3                       | 3.5          | 20.0                          | 1.4          | 3.2        | 4.6          | 6.6          |
| SL11                      | −95.2                             | −6.2         | 97.5                       | 6.3          | 192.7                         | 12.5         | 3.2        | 15.7         | 17.7         |
| SL12                      | −53.4                             | −3.5         | −                          | −            | −                             | −            | 3.2        | −            | −            |
| SL15                      | −41.2                             | −2.7         | −                          | −            | −                             | −            | 3.2        | −            | −            |
| <b>Mean</b>               | <b>−53.0</b>                      | <b>−3.5</b>  | <b>74</b>                  | <b>4.9</b>   | <b>106.0</b>                  | <b>7.0</b>   | <b>3.2</b> | <b>10.2</b>  | <b>12.2</b>  |
| <b>(SD)</b>               | <b>(43)</b>                       | <b>(2.8)</b> | <b>(33)</b>                | <b>(2.0)</b> | <b>(122)</b>                  | <b>(7.8)</b> |            | <b>(7.8)</b> | <b>(7.8)</b> |
| <b>Blind Lagoon Sites</b> |                                   |              |                            |              |                               |              |            |              |              |
| BL1                       | 53.0                              | 3.4          | 77.6                       | 5            | 24.6                          | 1.6          | 3.2        | 4.9          | 6.9          |
| BL3                       | 89.0                              | 5.7          | 109.7                      | 7            | 20.7                          | 1.3          | 3.2        | 4.6          | 6.6          |
| BL4                       | 69.9                              | 4.5          | −                          | −            | −                             | −            | 3.2        | −            | −            |
| BL6                       | 74.2                              | 4.7          | −                          | −            | −                             | −            | 3.2        | −            | −            |
| BL8                       | 52.2                              | 3.3          | 94.8                       | 6            | 42.6                          | 2.7          | 3.2        | 6.0          | 8.0          |
| BL9                       | 70.3                              | 4.5          | 147.4                      | 9.4          | 77.1                          | 4.9          | 3.2        | 8.2          | 10.2         |
| BL11                      | 42.2                              | 2.7          | −                          | −            | −                             | −            | 3.2        | −            | −            |
| BL12                      | 59.0                              | 3.7          | 89.6                       | 5.7          | 30.6                          | 1.9          | 3.2        | 5.2          | 7.2          |
| BL14                      | 61.6                              | 3.9          | 85.0                       | 5.4          | 23.4                          | 1.5          | 3.2        | 4.8          | 6.8          |
| <b>Mean</b>               | <b>63.0</b>                       | <b>4.0</b>   | <b>101.0</b>               | <b>6.4</b>   | <b>37.0</b>                   | <b>2.3</b>   | <b>3.2</b> | <b>5.6</b>   | <b>7.6</b>   |
| <b>(SD)</b>               | <b>(14)</b>                       | <b>(0.9)</b> | <b>(25)</b>                | <b>(1.6)</b> | <b>(22)</b>                   | <b>(1.4)</b> |            | <b>(1.4)</b> | <b>(1.4)</b> |
